# Supplementary material for: Reducing Antigenicity and Improving Antioxidant Capacity of β-Lactoglobulin through Covalent Interaction with Six Flavonoids
Source: MDPI journal article supplement (doi:10.3390/foods12152913), 2023-07-31
Supplement: s1 [file s1]

# Reducing Antigenicity and Improving Antioxidant Capacity of $\beta$ -Lactoglobulin through Covalent Interaction with Six Flavonoids

Pei Pu <sup>†</sup>, Zhifen Deng <sup>†</sup>, Lang Chen, Han Yang and Guizhao Liang <sup>\*</sup>

Key Laboratory of Biorheological Science and Technology, Ministry of Education, Bioengineering College, Chongqing University, Chongqing 400044, China

<sup>\*</sup> Correspondence: gzliang@cqu.edu.cn; Tel.: +86-23-6510-2507

<sup>†</sup> These authors contributed equally to this work.

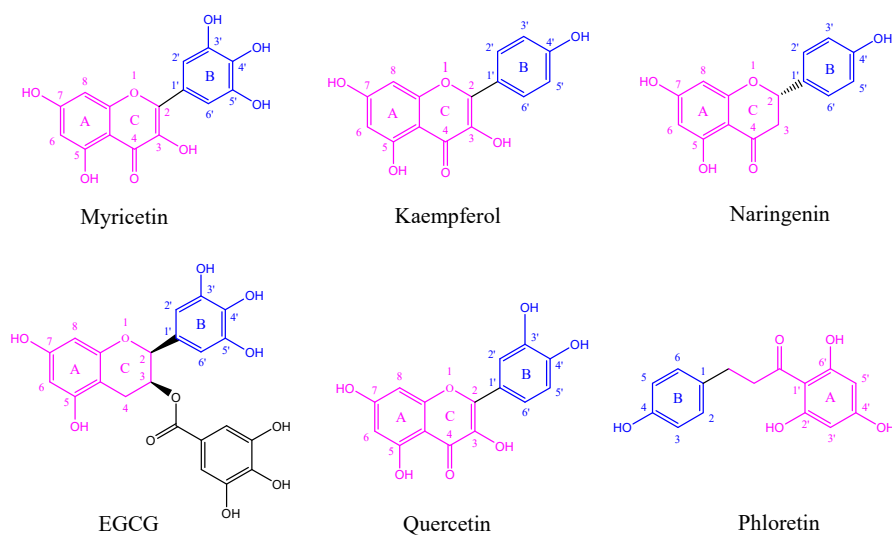

**Figure S1.** Chemical structures of six flavonoids (The skeleton structure C6-C3-C6 is labelled as the red (benzopyran: A and C rings) and blue group (phenyl: B ring).
